# Supplementary material for: Knowledge, Attitudes, and Practices of Fish Farmers Regarding Water Quality and Its Management in the Rwenzori Region of Uganda
Source: MDPI journal article supplement (doi:10.3390/w15010042), 2022-12-22
Supplement: s1 [file s1]

Archive with 2 entries (2 files):
- Examples of upstream sources of water pollution.pdf
- QESTIONNAIRE_COPY.pdf
