# Supplementary material for: Knowledge, Attitudes, and Practices of Fish Farmers Regarding Water Quality and Its Management in the Rwenzori Region of Uganda
Source: MDPI journal article supplement (doi:10.3390/w15010042), 2022-12-22
Supplement: s1 [file s1 › Examples of upstream sources of water pollution.pdf]

Supplementary material

# Knowledge, Attitudes, and Practices of Fish Farmers Regarding Water Quality and Its Management in the Rwenzori Region of Uganda

Athanasius Ssekyanzi <sup>1,2,\*</sup>, Nancy Nevejan <sup>1</sup>, Ronald Kabbiri <sup>3</sup>, Joshua Wesana <sup>2,4,5</sup> and Gilbert Van Stappen <sup>1</sup>

<sup>1</sup> Laboratory of Aquaculture & Artemia Reference Center, Department of Animal Sciences and Aquatic Ecology, Ghent University, Coupure Links 653, B-9000 Gent, Belgium

<sup>2</sup> Faculty of Agriculture and Environmental Sciences, Department of Crop & Animal Production, Mountains of the Moon University, P.O. Box 367, Fort Portal, Uganda

<sup>3</sup> Department of Agribusiness & Extension, Faculty of Agriculture & Animal Sciences, Busitema University, Jinja—Malaba Road, Tororo P.O. Box 236, Uganda

<sup>4</sup> Natural Resources Institute, University of Greenwich, Central Avenue, Chatham Maritime, Kent ME4 4TB, UK

<sup>5</sup> Department of Agriculture Economics, Faculty of Bioscience Engineering, Ghent University, Coupure Links 653, B-9000 Gent, Belgium

\* Correspondence: ssekyanziarthur@gmail.com or athanasius.ssekyanzi@ugent.be; Tel.: +256-773-962-035

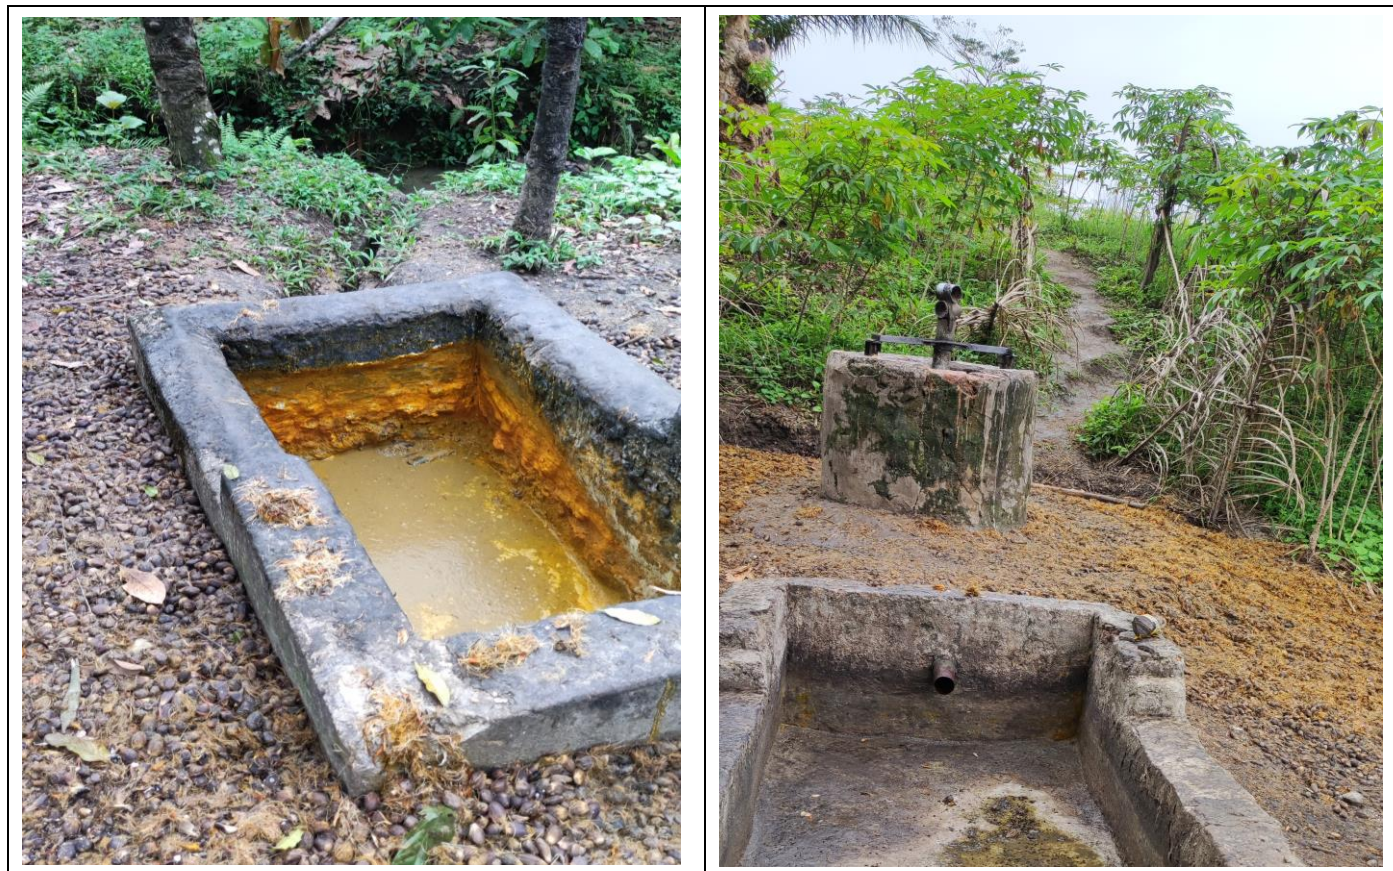

**Figure S1.** Artisanal palm-oil processing facilities are next to streams that are water sources for fish farms. These drain their waste directly into the streams.

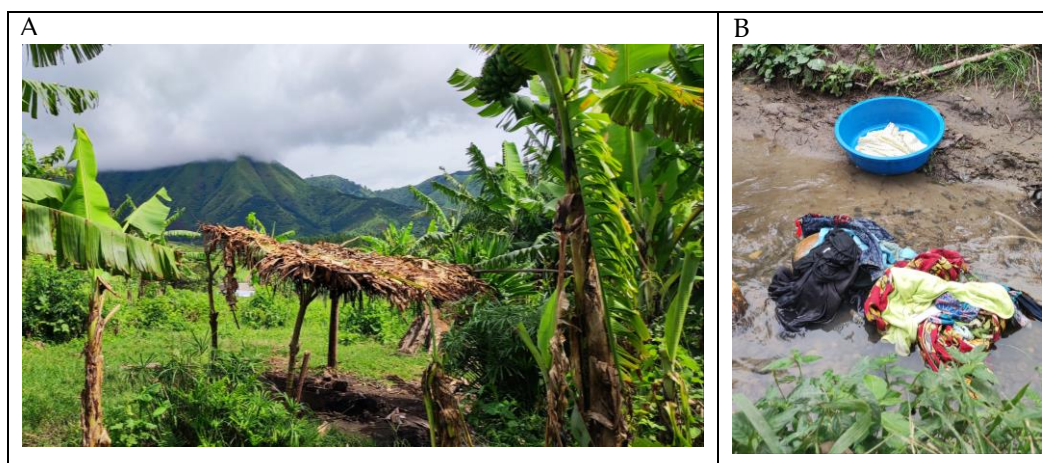

**Figure S2.** An artisanal alcohol brewing facility (A) and (B) clothes are being washed in the flowing stream. Both these activities take place upstream of fish farms.
